# Supplementary material for: A novel mechanism of regulation of the oncogenic transcription factor GLI3 by toll-like receptor signaling
Source: PubMed Central journal article supplement (PMC9348707; doi:10.18632/oncotarget.28261), 2022-08-03
Supplement: oncotarget-13-28261-s001.pdf [file oncotarget-13-28261-s001.pdf]

# A novel mechanism of regulation of the oncogenic transcription factor GLI3 by toll-like receptor signaling

## SUPPLEMENTARY MATERIALS

### Differentiation of monocyte cell lines into macrophages

Human monocyte cell lines (MM6, THP-1 and U937) ( $2 \times 10^6$  cells/ml) were differentiated into macrophages by stimulation with PMA (5 ng/ml) for 24 hr, followed by washing and allowing cells to rest for an additional 24 hr. Cells were then stimulated with 100 ng/ml LPS for 1 hr and GLI3 expression was determined by qPCR.

### Nuclear fractionation

THP-1 cells ( $10 \times 10^6$  cells) were treated with 1 mg/ml LPS for 24 hr. Cells were fractionated with NE-PER™ Nuclear and Cytoplasmic Extraction Reagents (Thermo Scientific) supplemented with 3% of 10×

Pierce™ protease inhibitor (Thermo Scientific). Nuclear and cytoplasmic fractions were analyzed by western blot using the following antibodies: Lamin (nuclear; Cell Signaling Technology, #2032s), Tubulin (cytoplasmic; Cell signaling Technology, #3873s) and GLI3 (Novus AF3690) antibodies.

### Generation and characterization of *M-Gli3*<sup>-/-</sup> mice

Mice lacking *Gli3* expression in myeloid cells were generated by crossing *Gli3*<sup>fl/fl</sup> mice (Jax stock # 008873) which harbor *loxP* sites flanking exon 8 of mouse *Gli3* with *LysM-cre*<sup>+/+</sup> mice (Jax stock # 004781). Mice genotyping is performed by PCR following recommendation on the Jackson Laboratory website.

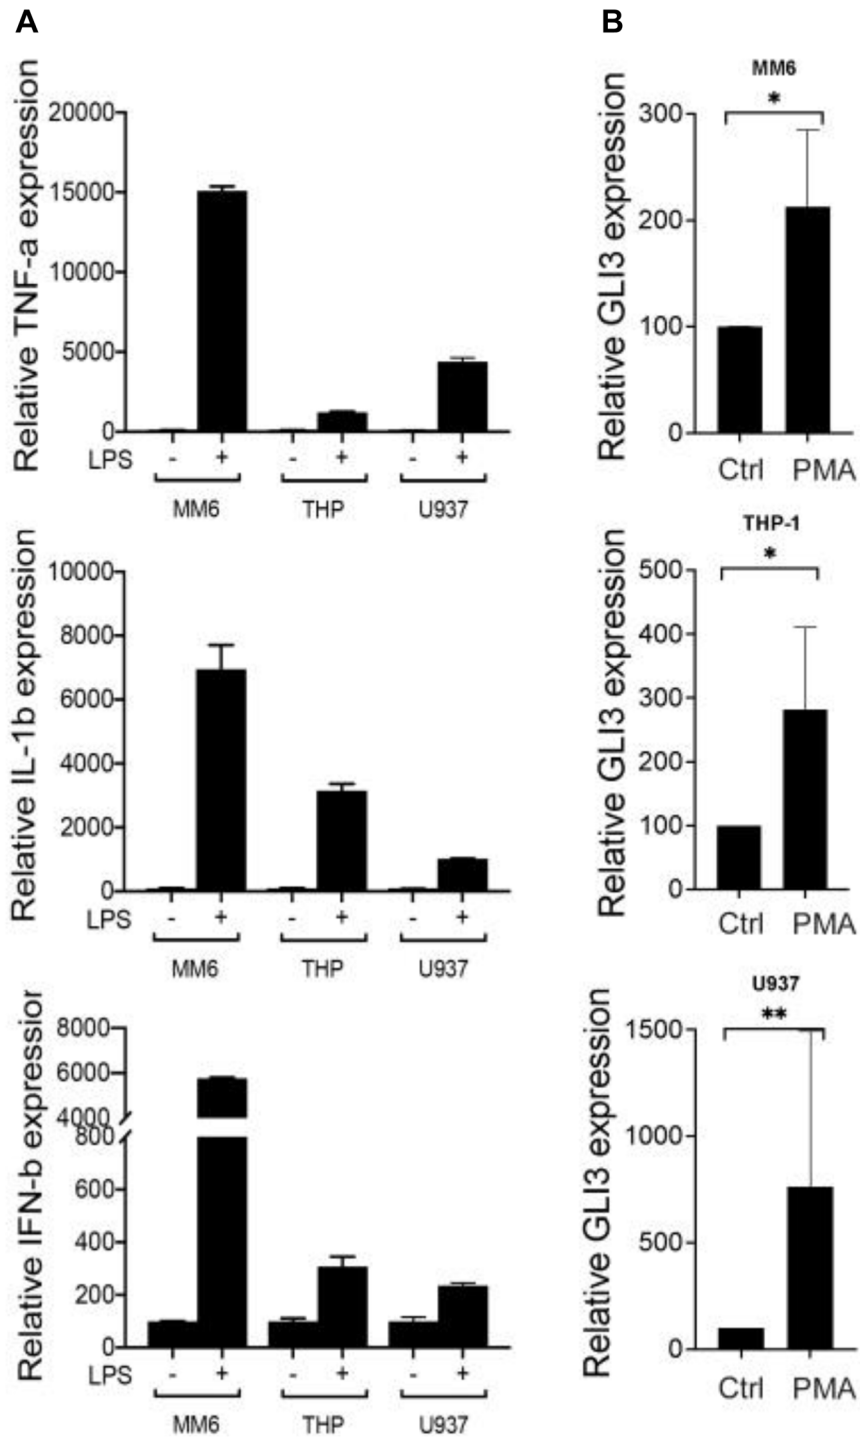

**Supplementary Figure 1: Human monocyte cell lines are responsive to TLR4 stimulation.** (A) Human monocyte cell lines (MM6, THP-1 and U937) ( $2 \times 10^6$  cells/ml) were treated with 100 ng/ml LPS for 1 hr. RNA was isolated and used to determine TNF-a, IL-1b and IFN-b expression by qPCR. (B) Monocyte cell lines ( $2 \times 10^6$  cells/ml) were differentiated into macrophages by stimulation with PMA (5 ng/ml) for 24 hr, followed by washing and allowing cells to rest for an additional 24 hr. Cells were then stimulated with 100 ng/ml LPS for 1 hr and GLI3 expression was determined by qPCR.

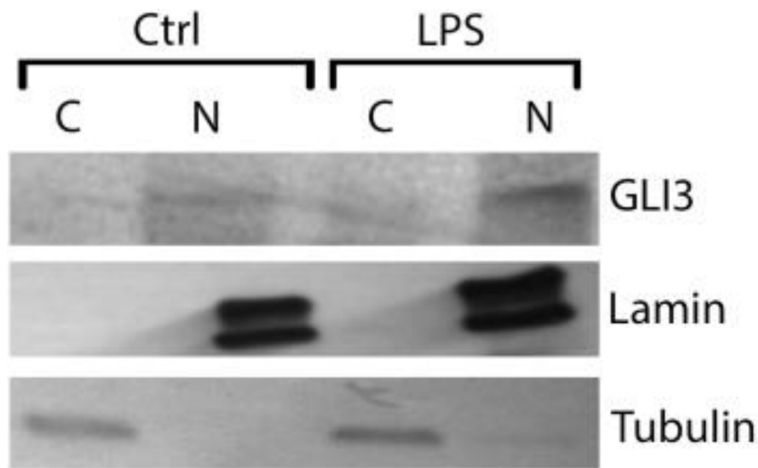

**Supplementary Figure 2: Nuclear expression of GLI3.** THP-1 cells ( $10 \times 10^6$  cells) were treated with 1 mg/ml LPS for 24 hr. Cells were fractionated with NE-PER™ Nuclear and Cytoplasmic Extraction Reagents (Thermo Scientific) supplemented with 3% of 10× Pierce™ protease inhibitor (Thermo Scientific). Nuclear and cytoplasmic fractions were analyzed by western blot.

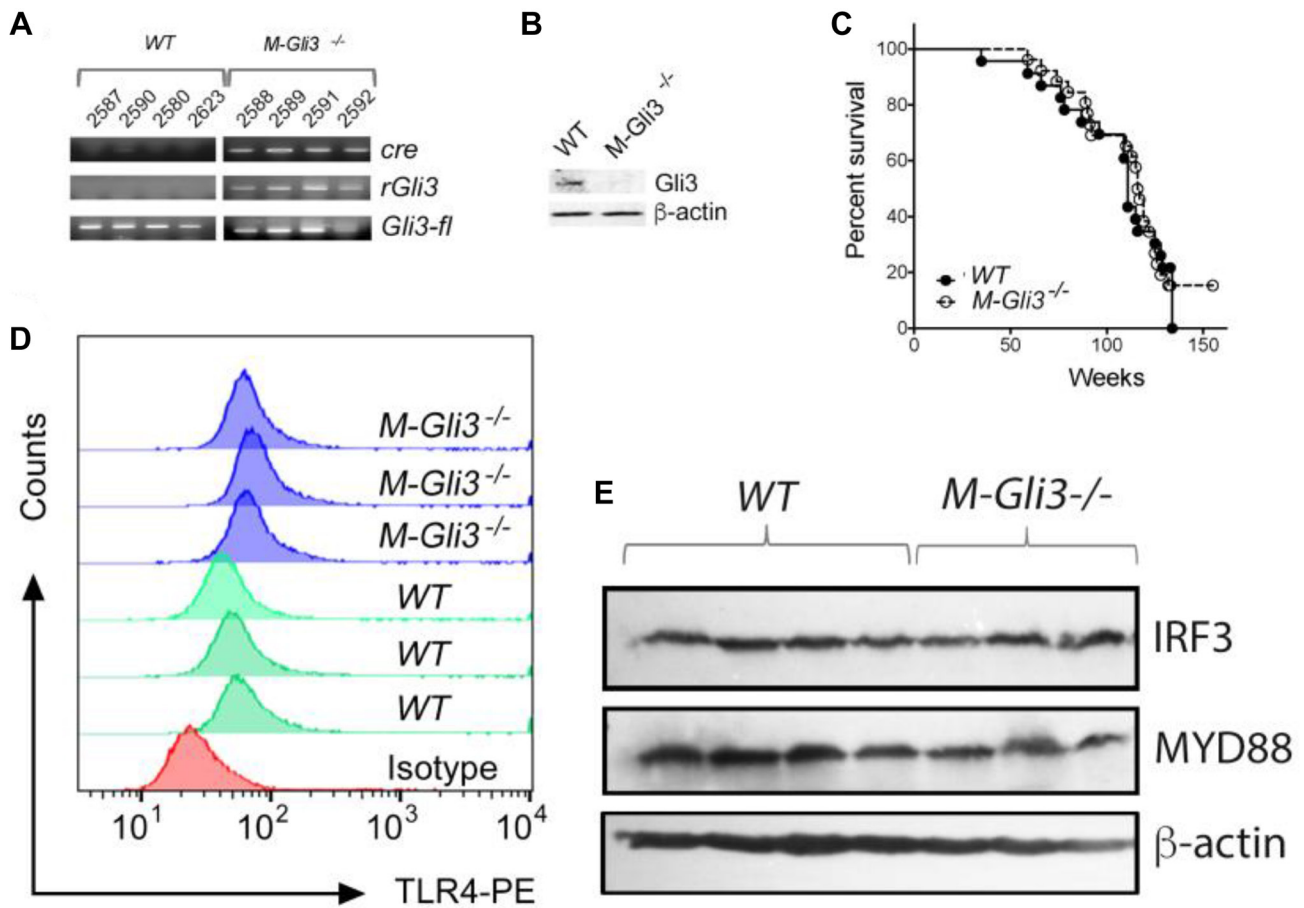

**Supplementary Figure 3: Generation and characterization of *M-Gli3*<sup>-/-</sup> mice.** (A) Mice are genotyped by PCR using primers specific for *Cre*, *Gli3fl/fl* (*Gli3-fl*) and the recombinant *Gli3* (*rGli3*). Numbers represent individual mice identifiers in our colony. (B) Western blot analysis of GLI3 expression in IFA-elicited macrophages from *WT* and *M-Gli3*<sup>-/-</sup> mice. (C) Overall survival of *WT* and *M-Gli3*<sup>-/-</sup> mice. Mice survival was monitored for 150 weeks. (D) Macrophages from *WT* and *M-Gli3*<sup>-/-</sup> mice ( $n = 3$  each) were stained with PE-conjugated TLR4 antibody followed by analysis on a FACS Calibur flow cytometer. (E) Macrophages from *WT* ( $n = 4$ ) and *M-Gli3*<sup>-/-</sup> ( $n = 3$ ) mice were lysed and used for western blot to determine IRF3 and MyD88 protein expression.

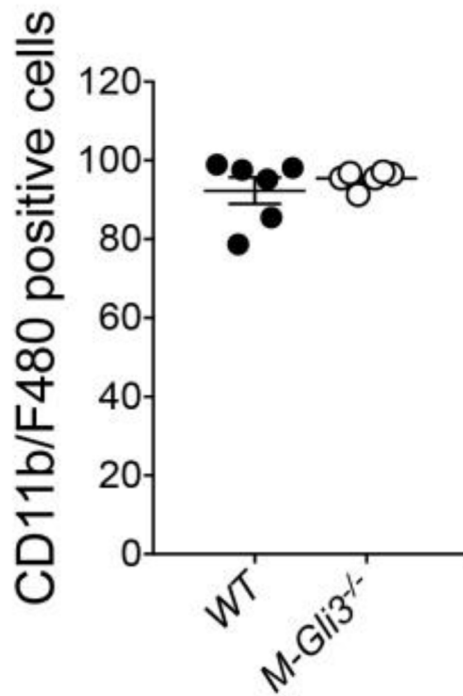

**Supplementary Figure 4: Similar macrophages in *M-Gli3<sup>-/-</sup>* and WT mice.** IFA-elicited macrophages from *WT* and *M-Gli3<sup>-/-</sup>* mice ( $n = 6$  each) were isolated and allowed to adhere to cell culture plates for 1 hr followed by washing non-adherent cells. Cells were then harvested and stained with antibodies for the macrophage markers CD11b and F4/80 followed by analysis on a FACS Calibur flow cytometer.

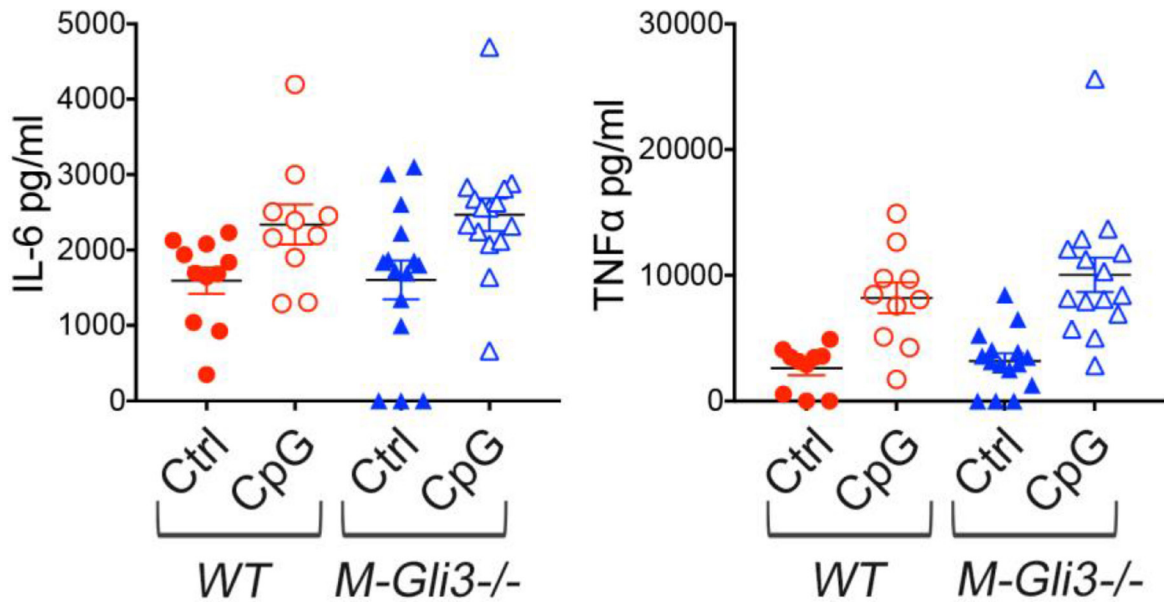

**Supplementary Figure 5: MYD88 stimulation is not altered in *M-Gli3<sup>-/-</sup>* and WT mice.** IFA-elicited macrophages from each mouse strain ( $n = 11$  *WT*;  $n = 15$  *M-Gli3<sup>-/-</sup>*) were stimulated with 10 mg/ml CpG or left untreated for 24 hr. Supernatants were used to quantify cytokine levels by ELISA.

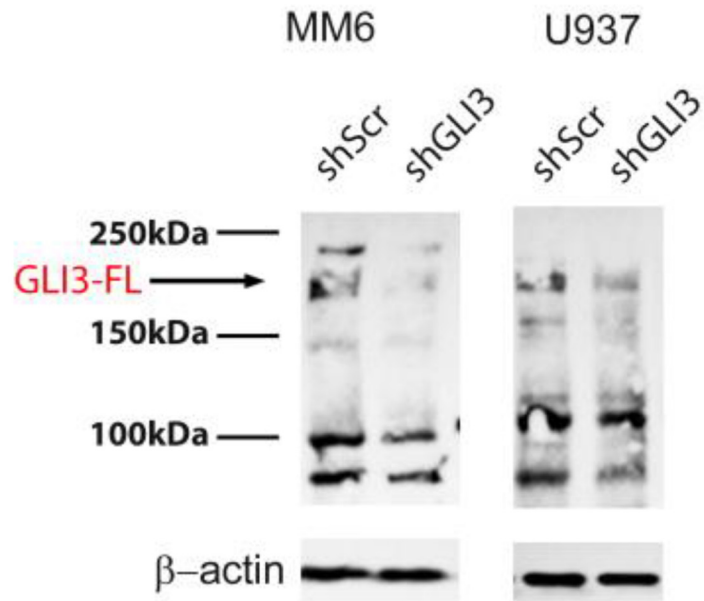

**Supplementary Figure 6: Validation of GLI3 antibodies by western blot.** Human monocyte cell lines (MM6 and U937) ( $4 \times 10^6$  cells/cuvette) were transfected by electroporation with shGLI3 or shScr. After 2 days, cells were lysed in western blot lysis buffer and analyzed by western blot to determine the expression of GLI3 (190 KDa).
